# Supplementary material
Source: PubMed Central journal article supplement (PMC10103644)
Supplement: NIHMS1782138-supplement-1.pdf [file NIHMS1782138-supplement-1.pdf]

1 **SUPPLEMENTARY FIGURE 1**

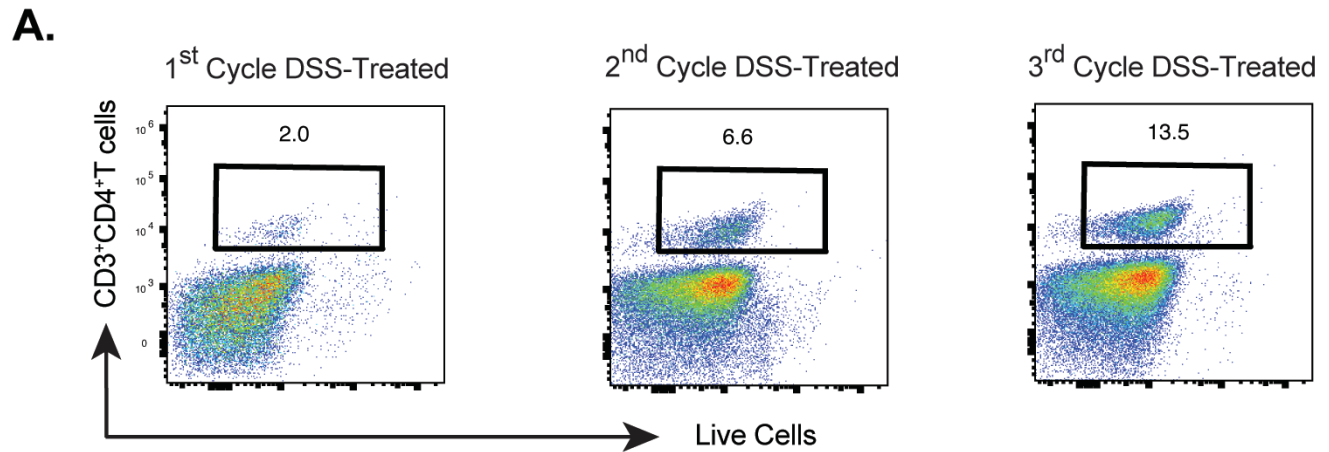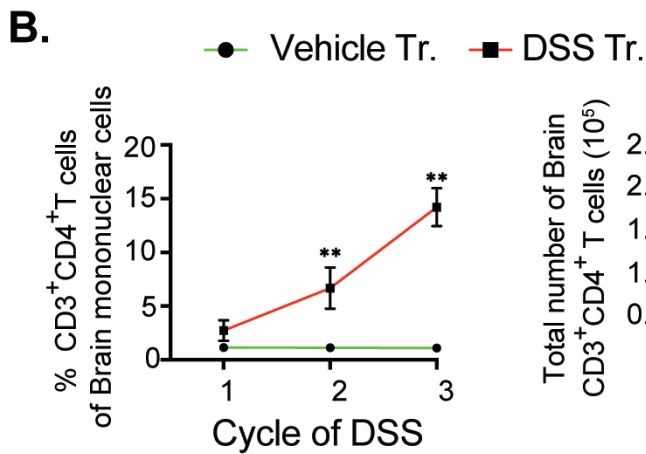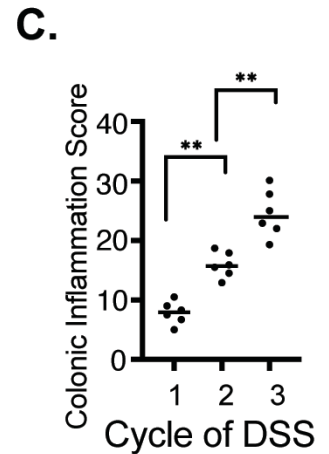

2  
3 **Supplementary Figure S1: CD4<sup>+</sup> T-cell infiltration in the brain during DSS-induced chronic colitis.**

4 (A) C57BL/6 mice were subjected to 3 cycles of 2.5% DSS in drinking water for one week followed by  
5 10-14 days in normal drinking water in between DSS-cycles for colitis induction. Brain infiltrating CD4<sup>+</sup>T  
6 cell frequency was analyzed by flow cytometry after each cycle of DSS-treatment. (B) Kinetics of  
7 CD3<sup>+</sup>CD4<sup>+</sup> T cells infiltration in the brain of DSS-treated mice presented as percent (left) and total number  
8 (right) following each cycle of DSS-treatment. (C) Intestinal inflammation score of DSS-treated mice  
9 after each cycle of treatment. Data are shown as mean ± SEM. (C). Data are representative of three  
10 independent experiments (6 mice /group). *P* values, one-way ANOVA followed by Tukey's post hoc test  
11 (B) and two-tailed paired Student *t*-test (C) \* *p*< 0.05; \*\* *p*< 0.001.

1 **SUPPLEMENTARY FIGURE 2**

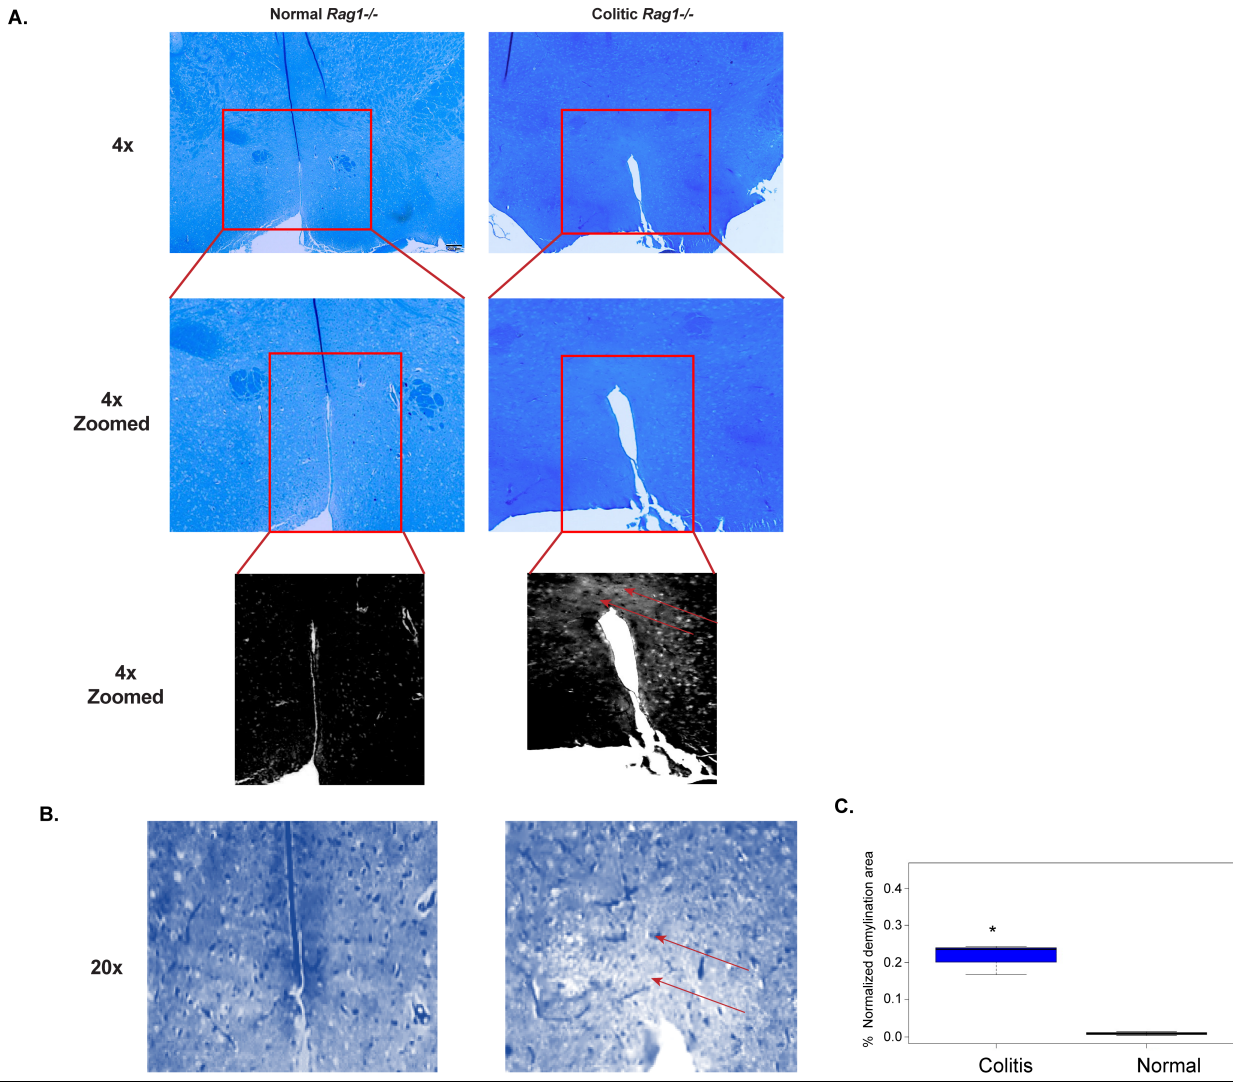

2  
3 **Supplementary Figure S2: Evidence of demyelination in the hypothalamic region of colitic mice.**

4 Luxol fast blue-PAS staining on the brain cross sections showing marked decrease in myelination in the  
5 hypothalamic region of CD45RB<sup>hi</sup> CD4<sup>+</sup>T cells recipient *Rag1*<sup>-/-</sup> mice compared to untransferred *Rag1*<sup>-/-</sup>  
6 normal mice at 4x or 4x zoomed magnification (A) and at 20x magnification. Red squares and Red arrows  
7 indicate the zone of demyelination (B). (C) Quantitative analysis of demyelination between colitic and  
8 normal, untransferred *Rag1*<sup>-/-</sup> mice. Data are shown as mean ± SEM. Data are representative of two  
9 independent experiments (3 mice /group). *P* values, two-tailed paired Student *t*-test (C) \* *p*< 0.001.

10

11

1 **SUPPLEMENTARY FIGURE 3**

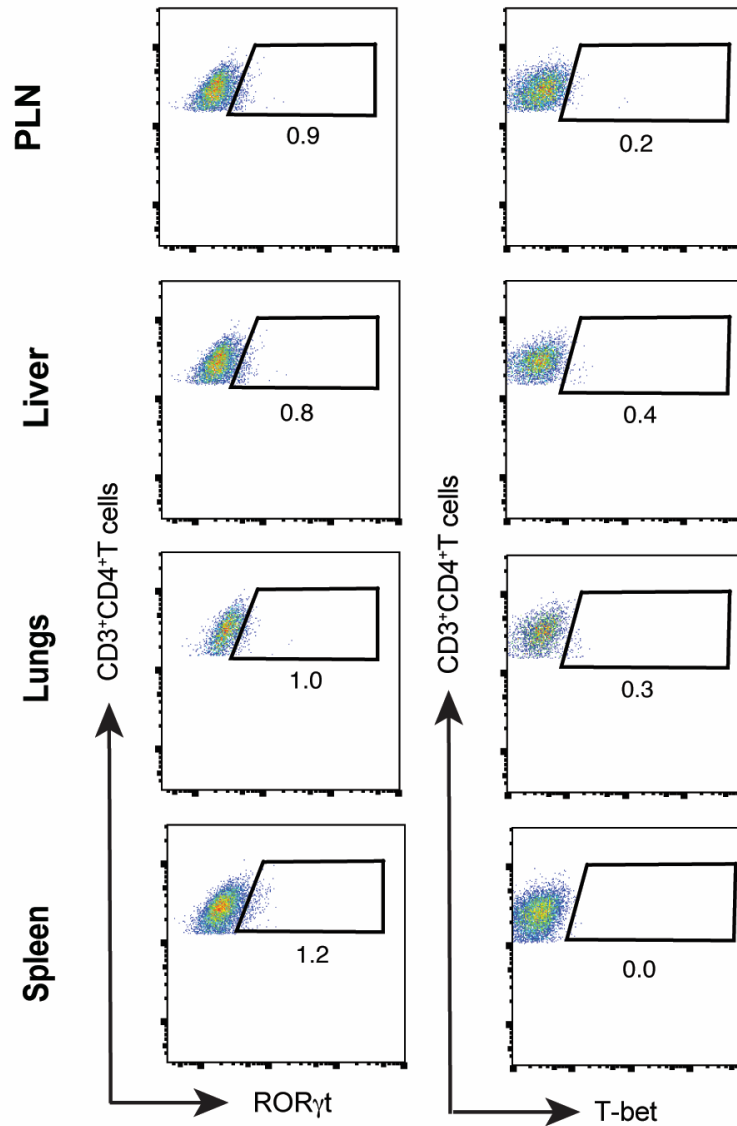

2

3 **Supplementary Figure S3: Expression of RORγt and T-bet from CD4<sup>+</sup>T cells in colitic *Rag1*<sup>-/-</sup> mice**  
4 **in the indicated organs.** Representative FACS plots showing RORγt and T-bet expressions in live CD4<sup>+</sup>T  
5 cells retrieved from the PLN, Liver, Lungs and Spleen of colitic *Rag1*<sup>-/-</sup> recipient group at 8 wk post  
6 CD45RB<sup>hi</sup> CD4<sup>+</sup>T cell transfer.

7

8

9

10

1 **SUPPLEMENTARY FIGURE 4**

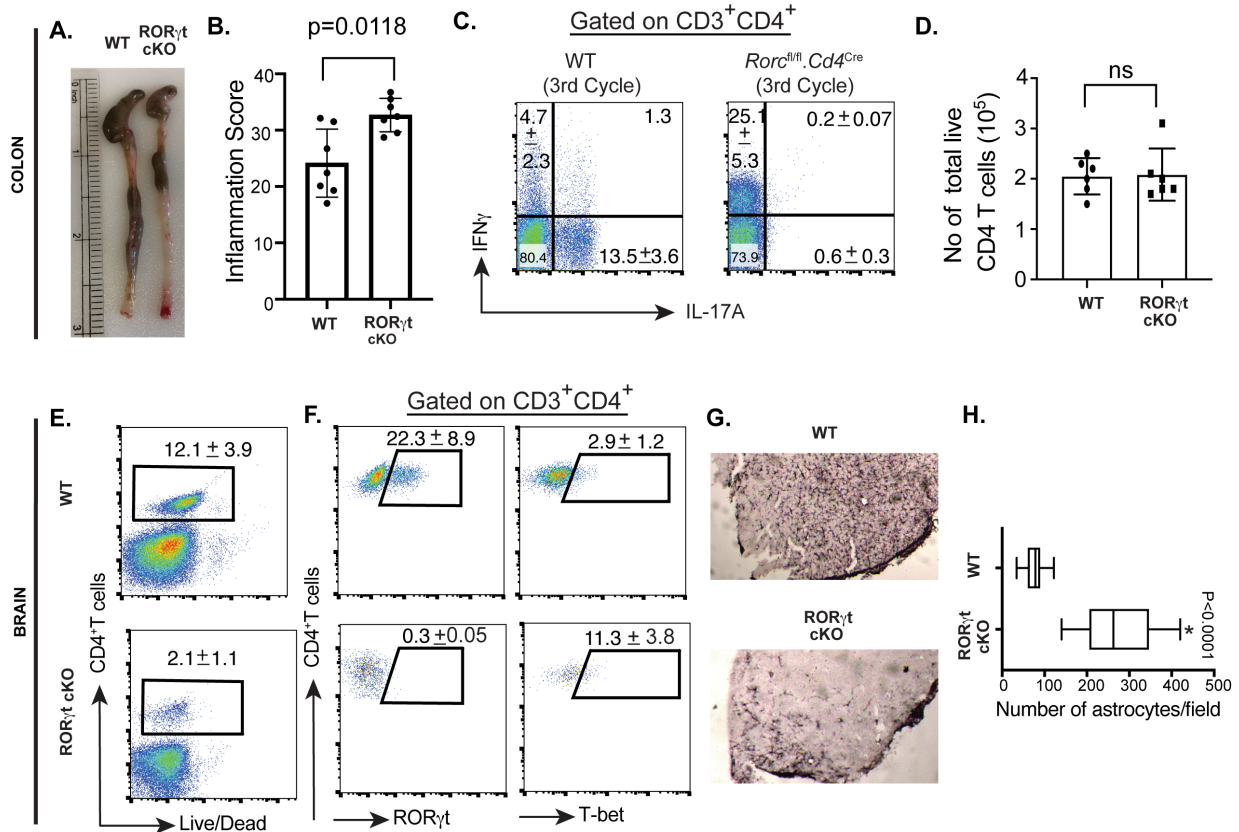

2

3 **Supplementary Figure 4: Differential impact of DSS-induced chronic colitis on CD4 $^{+}$ T cell-infiltration**

4 **and inflammation in the brain of WT and *Rorc $^{fl/fl}$ .Cd4-Cre* mice.** WT and *Rorc $^{fl/fl}$ .Cd4-Cre* mice were

5 subjected to 3 cycles of 2.5% DSS in drinking water. **(A, B)** Following cDSS treatment, *Rorc $^{fl/fl}$ .Cd4-Cre* mice

6 showed significantly more colonic inflammation. **(C)** Representative FACS plots showing colonic IFN $\gamma$  and IL-

7 17 expressions from gated CD3 $^{+}$ CD4 $^{+}$ T cells with mean percentages +/- SD of positive cells. **(D)** Total number

8 of colonic CD3 $^{+}$ CD4 $^{+}$ T cells from the indicated groups. **(E)** Representative FACS plots showing percentages of

9 brain-infiltrating CD4 $^{+}$ T cells with mean percentages +/- SD of positive cells. **(F)** ROR $\gamma$ t and T-bet expressions

10 from the brain infiltrating CD4 $^{+}$ T cells where mean percentages +/- SD of positive cells are shown (F). **(G, H)**

11 Photomicrograph showing astroglia in two groups of mice during cDSS-induced colitis. Data are

12 representative of two experiments (n=6 or 7/group) except G & H (5 mice/group). *P* values, two tailed unpaired

13 student *t* test are shown. Bar diagrams represent mean  $\pm$  SEM where n.s.= not significant (D).
